# Supplementary material
Source: Springer Nature journal article supplement (https://www.springermedizin.de/resource/supplementary/12891_2007_382_MOESM3_ESM.pdf/9510942)

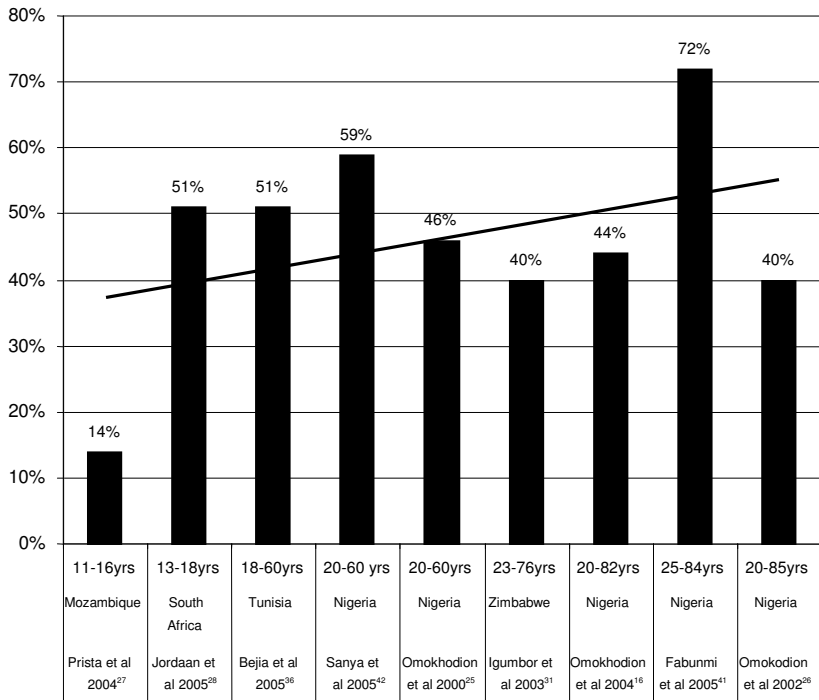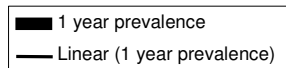

Supplement: MOESM3 [file 9510942]
